# Supplementary material for: A Novel Mechanical Metamaterial Exhibiting Auxetic Behavior and Negative Compressibility
Source: MDPI journal article supplement (doi:10.3390/ma13010079), 2019-12-22
Supplement: s1 [file s1]

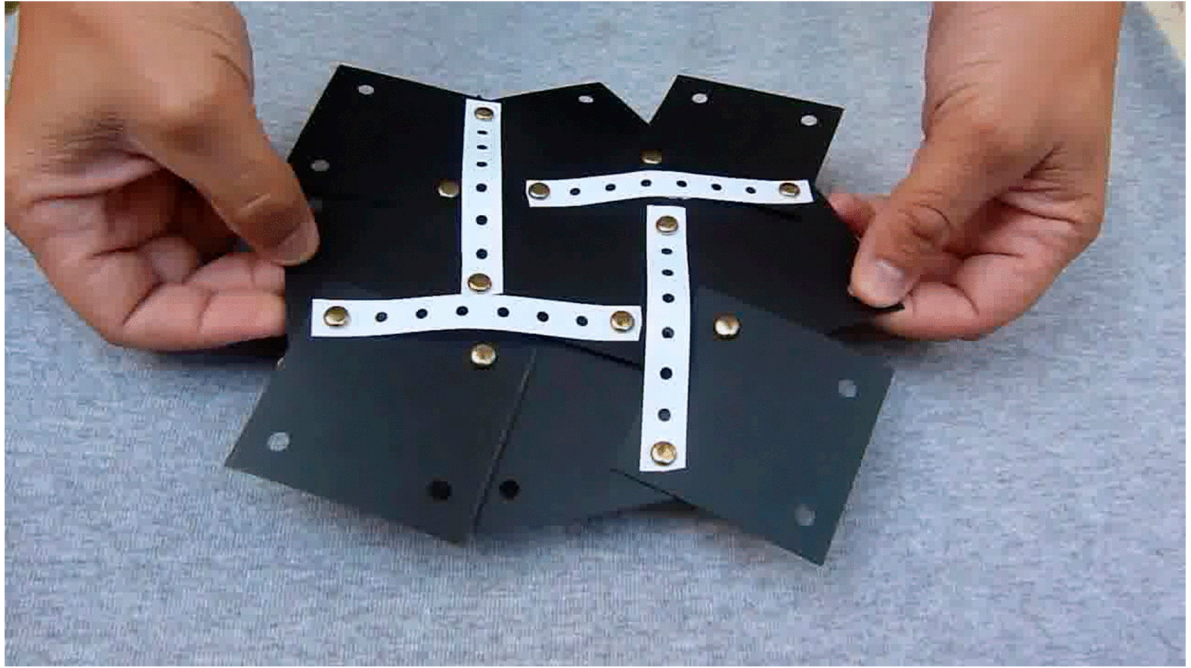

**Figure S1.** Animation of the Proposed Auxetic Mechanism.
